# Supplementary material for: Dissolution mechanism of cellulose in a benzyltriethylammonium/urea deep eutectic solvent (DES): DFT-quantum modeling, molecular dynamics and experimental investigation
Source: Royal Society of Chemistry journal article supplement (doi:10.1039/d3cp02335d), 2023-01-01
Supplement: d3cp02335d1.pdf [file d3cp02335d1.pdf]

**Dissolution Mechanism of Cellulose in Benzyltriethylammonium/Urea Deep Eutectic  
Solvent (DES): DFT-Quantum Modeling, Molecular Dynamics and Experimental  
Investigation**

**(Supplementary Data)**

Omar Azougagh<sup>\*a</sup>, Issam Jilal<sup>b</sup>, Loubna Jabir<sup>a</sup>, Hayat El-Hammi<sup>a</sup>, Soumya Essayeh<sup>a</sup>, Nor Mohammed<sup>c</sup>, Nafea Achalhi<sup>d</sup>, Ridouan El yousfi<sup>d</sup>, Abderrahmane El Idrissi<sup>d</sup>, Youssef El Ouardi<sup>b,c</sup>, Katri Laatikainen<sup>e</sup>, Mohamed Abou-Salama<sup>a</sup>, Soufian El Barkany<sup>\*a, c</sup>

<sup>a</sup>Laboratory of Molecular Chemistry, Materials and Environment (LMCME), Department of Chemistry, Faculty Multidisciplinary Nador, Mohamed 1st University, P. B. 300, Nador 62700, Morocco

<sup>b</sup>LIMOME Laboratory, Dhar El Mehraz Faculty of Sciences, Sidi Mohamed Ben Abdellah University, B.P. 1796 Atlas, Fes 30000, Morocco

<sup>c</sup>Applied Chemistry Unit, Sciences and Technologies Faculty, Abdelmalek Essaadi University, 32 003 Al Hoceima, Morocco

<sup>d</sup>Laboratory Applied Chemistry and Environmental (LCAE-URAC18), Faculty of Sciences of Oujda, Mohamed 1st University, 60000 Oujda, Morocco

<sup>e</sup>Laboratory of Separation Technology, Lappeenranta University of Technology, P.O. Box 20, FI-53851 Lappeenranta, Finland.

\*Corresponding authors. E-mail addresses: [el.barkany011@gmail.com](mailto:el.barkany011@gmail.com) (Soufian El Barkany), [o.azougagh91@gmail.com](mailto:o.azougagh91@gmail.com) (Omar Azougagh)

| BCP                                                               | $d(^{\circ}A)$ | $\rho(r)$ (a.u.) | $\square^2\rho(r)$ (a.u.) | $V(r)$ (a.u.) | $G(r)$ (a.u.) | $H(r)$ (a.u.) |
|-------------------------------------------------------------------|----------------|------------------|---------------------------|---------------|---------------|---------------|
| <i>CELLULOSE-DES</i>                                              |                |                  |                           |               |               |               |
| <b>BCP100</b><br>H <sub>cell</sub> (98)···O <sub>urea</sub> (49)  | 1.89           | 0.039148         | 0.127159                  | -0.34805E-01  | 0.33298E-01   | -0.15079E-02  |
| <b>BCP105</b><br>O <sub>cell</sub> (67)···H <sub>urea</sub> (52)  | 3.2            | 0.0105340        | 0.036392                  | -0.664657E-02 | 0.78723E-02   | 0.12258E-02   |
| <b>BCP122</b><br>H <sub>cell</sub> (62)···N <sub>urea</sub> (48)  | 1.96           | 0.004295         | 0.012793                  | -0.22686E-02  | 0.27335E-02   | 0.46491E-03   |
| <b>BCP144</b><br>H <sub>cell</sub> (67)···Br <sub>urea</sub> (37) | 4.12           | 0.007477         | 0.019154                  | -0.28826E-02  | 0.38355E-02   | 0.95295E-03   |
| <b>BCP181</b><br>H <sub>cell</sub> (95)···Br(37)                  | 2.56           | 0.006143         | 0.018004                  | -0.29733E-02  | 0.37372E-02   | 0.76391E-03   |
| <b>BCP233</b><br>O <sub>cell</sub> (85)···H <sub>urea</sub> (43)  | 2.42           | 0.018264         | 0.069110                  | -0.12577E-01  | 0.14927E-01   | 0.23504E-02   |
| <b>BCP247</b><br>O <sub>cell</sub> (89)···H <sub>urea</sub> (45)  | 2.24           | 0.016178         | 0.055002                  | -0.10116E-01  | 0.11933E-01   | 0.18173E-02   |
| <i>DES</i>                                                        |                |                  |                           |               |               |               |
| <b>BCP123</b><br>H <sub>urea</sub> (53)···Br(37)                  | 2.67           | 0.011946         | 0.0331574                 | -0.57622E-02  | 0.70258E-02   | 0.12636E-02   |
| <b>BCP128</b><br>H <sub>urea</sub> (51)···Br(37)                  | 2.52           | 0.013133         | 0.034870                  | -0.61743E-02  | 0.74459E-02   | 0.12716E-02   |
| <b>BCP197</b><br>H <sub>urea</sub> (42)···Br(37)                  | 2.69           | 0.012391         | 0.033674                  | -0.55057E-02  | 0.69621E-02   | 0.14564E-02   |

**Table SD1:** AIM Topological parameters values of DES-CELL system at hydrogen BCPs

|                       | $\eta_{inh}$ (ml/g) | $M_w$ | DP  |
|-----------------------|---------------------|-------|-----|
| Regenerated cellulose | 114                 | 31644 | 195 |
| Commercial cellulose  | 122                 | 34390 | 212 |

**Table SD2:**  $M_w$  and DP of Commercial and regenerated Cellulose

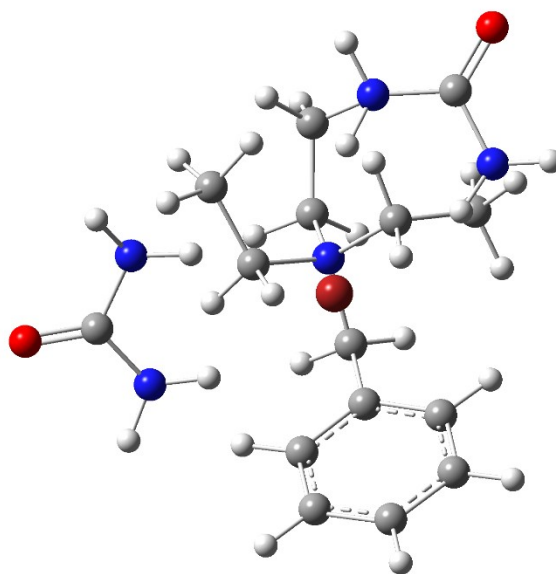

| Atomic type | X        | Y        | Z        |
|-------------|----------|----------|----------|
| C           | -0.5521  | 2.09611  | 0.00723  |
| C           | -1.40068 | 2.067    | -1.09896 |
| C           | -0.87248 | 2.13891  | -2.3894  |
| C           | 0.50705  | 2.25353  | -2.56797 |
| C           | 1.35426  | 2.28414  | -1.46085 |
| C           | 0.83819  | 2.1857   | -0.15958 |
| C           | 1.74749  | 2.25013  | 1.04277  |
| N           | 2.33256  | 0.9083   | 1.56102  |
| C           | 3.1053   | 1.26469  | 2.83102  |
| C           | 4.12734  | 0.25705  | 3.35426  |
| C           | 1.1386   | -0.01737 | 1.85662  |

---

|    |          |          |          |
|----|----------|----------|----------|
| C  | 3.21816  | 0.25925  | 0.49769  |
| C  | 4.43964  | 1.06322  | 0.06919  |
| C  | 1.41739  | -1.33292 | 2.56831  |
| H  | -0.97777 | 2.03682  | 1.00485  |
| H  | -2.47329 | 1.98627  | -0.95168 |
| H  | -1.53194 | 2.10314  | -3.25101 |
| H  | 0.92517  | 2.31249  | -3.56794 |
| H  | 2.42393  | 2.37988  | -1.61801 |
| H  | 2.61123  | 2.88444  | 0.84193  |
| H  | 1.21503  | 2.66717  | 1.90098  |
| H  | 3.61369  | 2.20853  | 2.61978  |
| H  | 2.34242  | 1.46667  | 3.58828  |
| H  | 4.57177  | 0.69451  | 4.25445  |
| H  | 3.69242  | -0.70052 | 3.63268  |
| H  | 4.93828  | 0.074    | 2.64802  |
| H  | 0.69745  | -0.22959 | 0.88132  |
| H  | 0.44196  | 0.58878  | 2.44114  |
| H  | 3.51894  | -0.70962 | 0.89454  |
| H  | 2.55738  | 0.05082  | -0.34536 |
| H  | 4.18888  | 2.01043  | -0.41415 |
| H  | 5.1364   | 1.27152  | 0.88519  |
| H  | 4.96699  | 0.45161  | -0.66844 |
| H  | 0.49133  | -1.9136  | 2.50426  |
| H  | 1.66245  | -1.21042 | 3.62606  |
| H  | 2.19023  | -1.9254  | 2.07333  |
| Br | 0.5899   | -1.67635 | -1.33579 |
| N  | -1.29466 | -3.27382 | 1.11626  |
| C  | -2.42888 | -2.48706 | 1.20252  |
| N  | -2.3267  | -1.2749  | 0.54121  |
| O  | -3.41068 | -2.79857 | 1.87512  |
| H  | -1.44083 | -4.23367 | 1.39368  |
| H  | -0.66108 | -3.11106 | 0.33446  |
| H  | -3.21546 | -0.81686 | 0.40189  |

---

|   |          |          |          |
|---|----------|----------|----------|
| H | -1.64966 | -1.19999 | -0.21664 |
| N | 3.96506  | -1.90962 | -2.09237 |
| C | 4.40895  | -2.86655 | -1.19706 |
| N | 3.47536  | -3.21707 | -0.23461 |
| O | 5.5599   | -3.30097 | -1.20009 |
| H | 4.53634  | -1.83161 | -2.92156 |
| H | 2.95834  | -1.803   | -2.21709 |
| H | 3.69688  | -4.07802 | 0.24543  |
| H | 2.49167  | -3.05536 | -0.45563 |

**Table SD3:** Optimized geometry and Cartesian coordinates of DES at B3LYP/6-311+G(d,p) level.

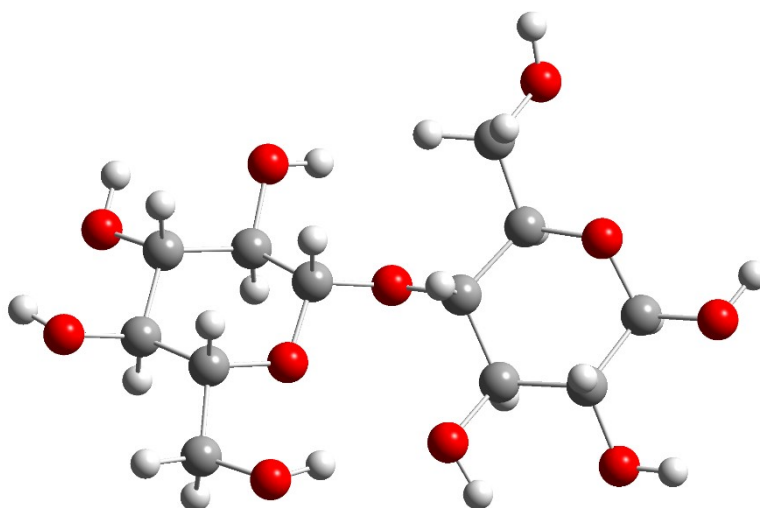

| Atomic type | X        | Y        | Z        |
|-------------|----------|----------|----------|
| C           | -2.77252 | -1.37138 | 0.49157  |
| C           | -3.12233 | -2.78323 | -0.01041 |
| C           | -4.644   | -2.99066 | -0.0768  |
| C           | -5.30167 | -1.86358 | -0.86334 |
| C           | -3.62248 | -0.30092 | -0.23009 |
| H           | -2.71655 | -2.88253 | -1.02112 |
| H           | -2.99517 | -1.31006 | 1.56422  |
| H           | -4.91687 | -1.84292 | -1.89389 |
| H           | -3.26786 | -0.17721 | -1.25831 |

---

|   |          |          |          |
|---|----------|----------|----------|
| H | -5.03719 | -2.972   | 0.95174  |
| O | -4.99933 | -0.62606 | -0.21907 |
| O | -4.95213 | -4.23138 | -0.69693 |
| H | -4.38091 | -4.88377 | -0.26672 |
| O | -2.63612 | -3.8032  | 0.81903  |
| O | -1.39536 | -1.06364 | 0.23719  |
| H | -0.90202 | -1.06628 | 1.08249  |
| O | -3.56116 | 0.92462  | 0.49202  |
| C | -6.82041 | -1.95934 | -0.90338 |
| H | -7.20237 | -1.99647 | 0.12634  |
| H | -7.11464 | -2.87433 | -1.41574 |
| O | -7.39234 | -0.86926 | -1.61784 |
| C | -2.31039 | 4.08593  | -1.22377 |
| C | -3.25376 | 2.90414  | -0.96964 |
| C | -2.63289 | 1.92187  | 0.04775  |
| C | -2.1843  | 2.68409  | 1.30947  |
| C | -1.86425 | 4.72103  | 0.08823  |
| H | -4.19451 | 3.28514  | -0.5488  |
| H | -1.41822 | 3.71034  | -1.74211 |
| H | -3.05044 | 3.13952  | 1.80531  |
| H | -2.72015 | 5.17823  | 0.60809  |
| H | -1.7564  | 1.44409  | -0.39395 |
| O | -1.27419 | 3.73869  | 0.91361  |
| O | -3.51245 | 2.22901  | -2.19139 |
| O | -3.01351 | 5.01908  | -2.03663 |
| H | -2.41227 | 5.73083  | -2.28234 |
| O | -0.8865  | 5.69703  | -0.22806 |
| H | -0.76874 | 6.29377  | 0.51958  |
| C | -1.4662  | 1.7468   | 2.27192  |
| H | -0.63677 | 1.26196  | 1.74867  |
| H | -2.18299 | 0.97544  | 2.56694  |
| O | -0.97597 | 2.43845  | 3.40441  |
| H | -0.29145 | 1.86477  | 3.79928  |

---

|   |          |          |          |
|---|----------|----------|----------|
| H | -3.90807 | 2.86293  | -2.80149 |
| H | -7.01401 | -0.0641  | -1.2449  |
| H | -1.75387 | -4.13272 | 0.56831  |

**Table SD4:** Optimized geometry and Cartesian coordinates of cellobiose at at B3LYP/6-311+G(d,p) level.

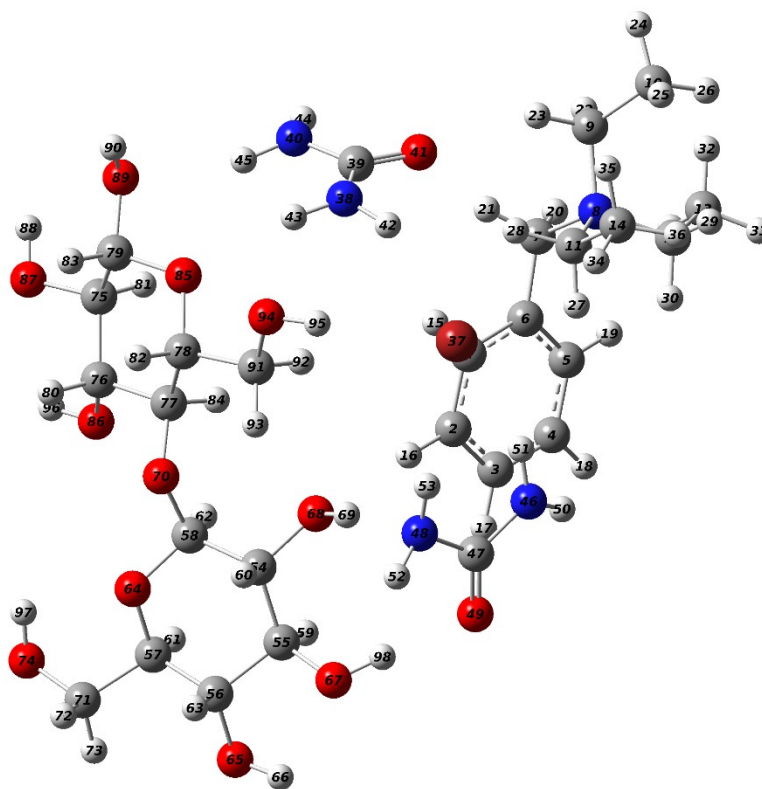

| Atomic type | X       | Y        | Z        |
|-------------|---------|----------|----------|
| C           | 1.73746 | -0.74863 | -1.47652 |
| C           | 0.63815 | -1.57985 | -1.6479  |
| C           | 0.75369 | -2.69288 | -2.50108 |
| C           | 1.96219 | -2.95284 | -3.17427 |
| C           | 3.05797 | -2.10315 | -2.99004 |
| C           | 2.96181 | -1.00423 | -2.13104 |
| C           | 4.09624 | -0.01845 | -1.953   |

---

|    |          |          |          |
|----|----------|----------|----------|
| N  | 5.10768  | -0.32385 | -0.82068 |
| C  | 6.04966  | 0.90618  | -0.8081  |
| C  | 7.36068  | 0.75642  | -0.06311 |
| C  | 4.26294  | -0.44915 | 0.47225  |
| C  | 5.85541  | -1.61243 | -1.04563 |
| C  | 6.72552  | -1.67974 | -2.3005  |
| C  | 4.97269  | -0.61652 | 1.81109  |
| H  | 1.66157  | 0.1033   | -0.8203  |
| H  | -0.29654 | -1.38427 | -1.1225  |
| H  | -0.09596 | -3.35849 | -2.63884 |
| H  | 2.04028  | -3.81453 | -3.84957 |
| H  | 3.97507  | -2.29659 | -3.53193 |
| H  | 4.69328  | 0.06432  | -2.86242 |
| H  | 3.70508  | 0.9799   | -1.70358 |
| H  | 6.26158  | 1.1305   | -1.85686 |
| H  | 5.42802  | 1.72306  | -0.42717 |
| H  | 7.89945  | 1.7014   | -0.17501 |
| H  | 7.25462  | 0.57533  | 1.00123  |
| H  | 7.98781  | -0.02983 | -0.49135 |
| H  | 3.6052   | -1.29745 | 0.29145  |
| H  | 3.65998  | 0.44583  | 0.48733  |
| H  | 6.47156  | -1.77019 | -0.16025 |
| H  | 5.09834  | -2.39483 | -1.06408 |
| H  | 6.15027  | -1.60009 | -3.22346 |
| H  | 7.50448  | -0.91782 | -2.31517 |
| H  | 7.22044  | -2.65337 | -2.3148  |
| H  | 4.17023  | -0.81003 | 2.52682  |
| H  | 5.47993  | 0.29916  | 2.12658  |
| H  | 5.67102  | -1.45359 | 1.86708  |
| Br | 1.48701  | -0.31299 | 2.57418  |
| N  | 1.65574  | 2.95231  | 1.03803  |
| C  | 2.4027   | 3.31828  | -0.0114  |
| N  | 2.00752  | 4.46484  | -0.66152 |

---

---

|   |          |          |          |
|---|----------|----------|----------|
| O | 3.40676  | 2.66135  | -0.3491  |
| H | 1.83752  | 2.06743  | 1.47829  |
| H | 0.75104  | 3.33278  | 1.19615  |
| H | 2.48859  | 4.69475  | -1.51958 |
| H | 1.07251  | 4.84766  | -0.52682 |
| N | 1.82285  | -3.65589 | 1.42142  |
| C | 0.50471  | -3.95804 | 1.51446  |
| N | -0.09907 | -3.46389 | 2.6538   |
| O | -0.06991 | -4.60816 | 0.68895  |
| H | 2.17666  | -3.80557 | 0.52028  |
| H | 2.08357  | -2.78667 | 1.83548  |
| H | -1.1057  | -3.52851 | 2.66493  |
| H | 0.30106  | -2.67865 | 3.13287  |
| C | -2.77252 | -1.37138 | 0.49157  |
| C | -3.12233 | -2.78323 | -0.01041 |
| C | -4.644   | -2.99066 | -0.0768  |
| C | -5.30167 | -1.86358 | -0.86334 |
| C | -3.62248 | -0.30092 | -0.23009 |
| H | -2.71655 | -2.88253 | -1.02112 |
| H | -2.99517 | -1.31006 | 1.56422  |
| H | -4.91687 | -1.84292 | -1.89389 |
| H | -3.26786 | -0.17721 | -1.25831 |
| H | -5.03719 | -2.972   | 0.95174  |
| O | -4.99933 | -0.62606 | -0.21907 |
| O | -4.95213 | -4.23138 | -0.69693 |
| H | -4.38091 | -4.88377 | -0.26672 |
| O | -2.63612 | -3.8032  | 0.81903  |
| O | -1.39536 | -1.06364 | 0.23719  |
| H | -0.90202 | -1.06628 | 1.08249  |
| O | -3.56116 | 0.92462  | 0.49202  |
| C | -6.82041 | -1.95934 | -0.90338 |
| H | -7.20237 | -1.99647 | 0.12634  |
| H | -7.11464 | -2.87433 | -1.41574 |

---



---

|   |          |          |          |
|---|----------|----------|----------|
| O | -7.39234 | -0.86926 | -1.61784 |
| C | -2.31039 | 4.08593  | -1.22377 |
| C | -3.25376 | 2.90414  | -0.96964 |
| C | -2.63289 | 1.92187  | 0.04775  |
| C | -2.1843  | 2.68409  | 1.30947  |
| C | -1.86425 | 4.72103  | 0.08823  |
| H | -4.19451 | 3.28514  | -0.5488  |
| H | -1.41822 | 3.71034  | -1.74211 |
| H | -3.05044 | 3.13952  | 1.80531  |
| H | -2.72015 | 5.17823  | 0.60809  |
| H | -1.7564  | 1.44409  | -0.39395 |
| O | -1.27419 | 3.73869  | 0.91361  |
| O | -3.51245 | 2.22901  | -2.19139 |
| O | -3.01351 | 5.01908  | -2.03663 |
| H | -2.41227 | 5.73083  | -2.28234 |
| O | -0.8865  | 5.69703  | -0.22806 |
| H | -0.76874 | 6.29377  | 0.51958  |
| C | -1.4662  | 1.7468   | 2.27192  |
| H | -0.63677 | 1.26196  | 1.74867  |
| H | -2.18299 | 0.97544  | 2.56694  |
| O | -0.97597 | 2.43845  | 3.40441  |
| H | -0.29145 | 1.86477  | 3.79928  |
| H | -3.90807 | 2.86293  | -2.80149 |
| H | -7.01401 | -0.0641  | -1.2449  |
| H | -1.75387 | -4.13272 | 0.56831  |

---

**Table SD5:** Optimized geometry and Cartesian coordinates of DES-CELL system at B3LYP/6-311+G(d,p) level.
